# Supplementary material
Source: PubMed Central journal article supplement (PMC1299175)
Supplement: 5-7400280s1.pdf [file 5-7400280s1.pdf]

## Supplementary Figure 1

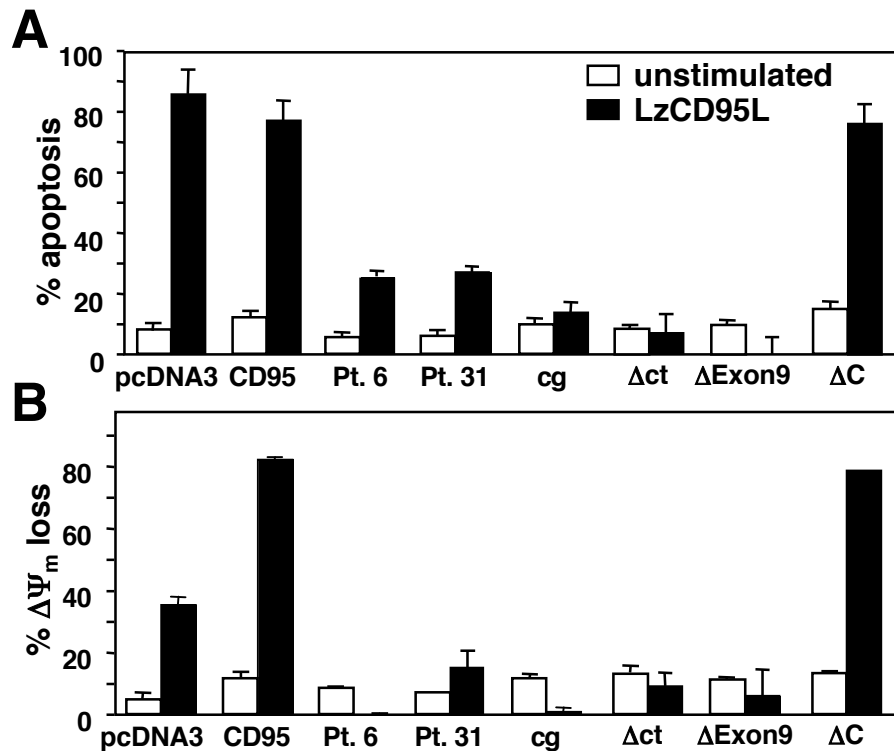

**Supplementary Figure 1:** (A) Quantification of caspase-3 activation in Jurkat cells transfected with wild-type or CD95 mutants, as indicated. (B) Analysis of  $\Delta\Psi_m$  in Jurkat cells transfected, as in panel A.

*Transfections.*  $5 \times 10^6$  Jurkat T cells were transfected with CD95 constructs and pEGFP vector at a 3:1 ratio (20  $\mu$ g of total DNA) or MCF7 cells (see Fig 3) were transfected with pEGFP/pCi or pCi-CD95 mutants at a ratio of 1:3:3 using an Electrosquare Porator T820 (BTX electroporation system, San Diego, CA). After electroporation (310 V, 1 pulse, 10 ms) the cells were placed in fresh medium and incubated for 1 day at 37°C. Viable cells were isolated by Ficoll centrifugation. For induction of apoptosis, cells were immediately treated with the desired reagents.
