# Supplementary material
Source: PubMed Central journal article supplement (PMC1299175)
Supplement: 5-7400280s2.pdf [file 5-7400280s2.pdf]

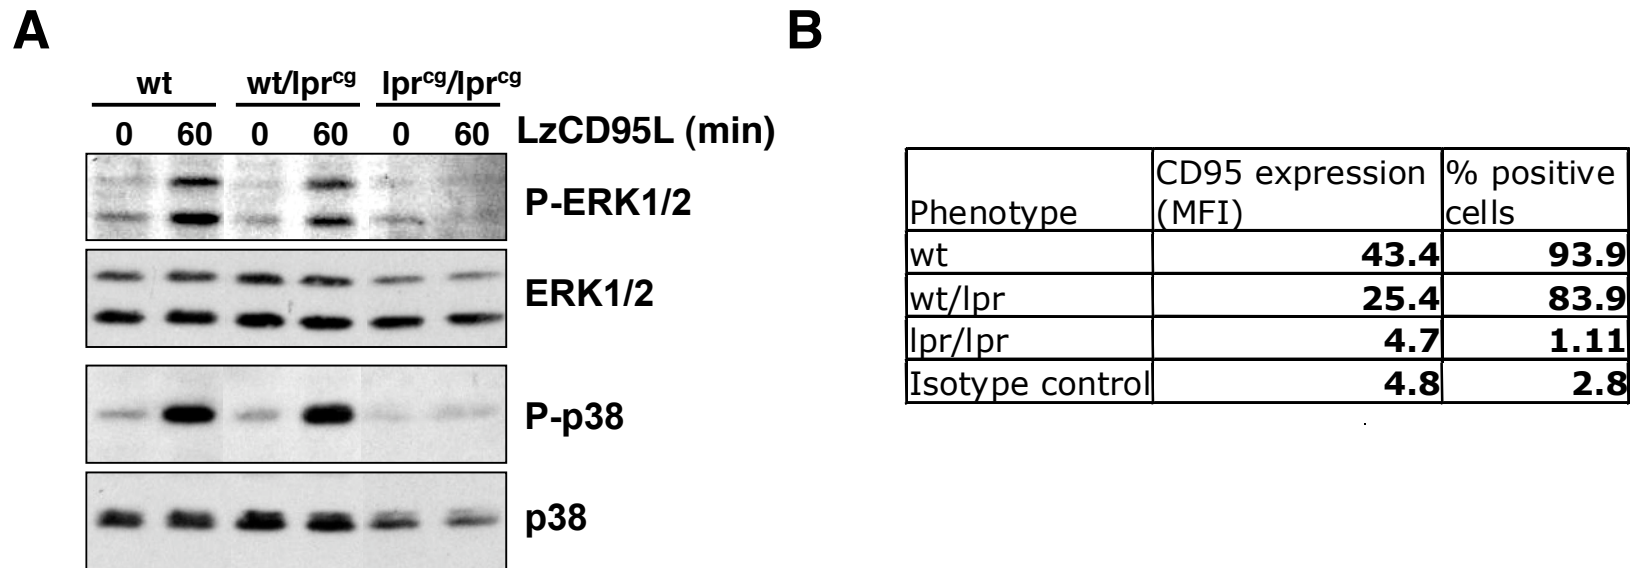

**Supplementary Figure 2:** (A) Activated splenocytes from the indicated mouse strains were left untreated (0) or stimulated with 1  $\mu$ g/ml LzCD95L for 60 min (60) and lysates of the cells subjected to Western blot analysis for phosphorylation of indicated MAP kinases. (B) Surface expression of CD95 on splenocytes from C3H lpr/wt mice. Surface staining for CD95 was done in duplicate and the mean is shown. Data represent CD95 expression and % positive cells in activated (anti-CD3 $\epsilon$ /IL2) splenocytes. MFI: mean fluorescence intensity. Surface staining was performed as previously described (Algeciras-Schimnich et al., 2003).

*Western Blot Analysis.* Cells were lysed in denaturing buffer (10% glycerol, 2% SDS (w/v), 5% 2-mercaptoethanol (v/v), 250  $\mu$ g/l bromophenol blue), boiled 5 min and then separated in a 12% SDS-PAGE. Western blot analysis was performed as previously described (Barnhart et al., 2004) using the following antibodies: Phospho-specific and whole protein anti-p38 and anti-ERK1/2 antibodies (Cell signaling), anti-mouse caspase-8 (clone 3B10) (see Fig 3F) provided by A. Strasser (The Walter and Eliza Hall Institute of Medical Research, Victoria, Australia) and appropriate secondary antibodies.

#### References

Algeciras-Schimnich, A., Pietras, E.M., Barnhart, B.C., Legembre, P., Vijayan, S., Holbeck, S.L. and Peter, M.E. (2003) Two CD95 tumor classes with different sensitivities to antitumor drugs. *Proc Natl Acad Sci U S A*, **100**, 11445-11450.

Barnhart B.C., Legembre, P., Pietras, E.M., Bubici, C., Franzoso, G. and Peter, M.E. (2004) CD95 ligand induces motility and invasiveness of apoptosis resistant tumor cells. *EMBO J*, **23**, 3175-3185.
